# Supplementary material
Source: Springer Nature journal article supplement (https://www.springermedizin.de/resource/supplementary/12937_2011_436_MOESM4_ESM.pdf/25653108)

# Total Gastric Volume

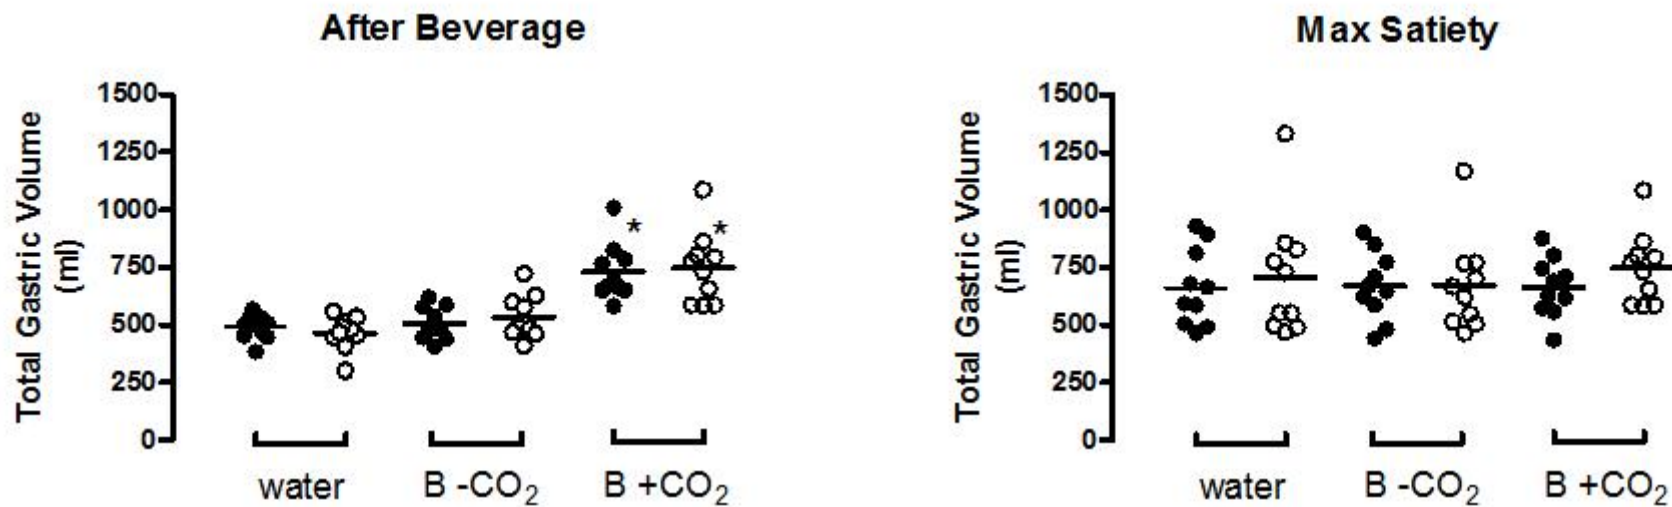

● Solid meal    ○ Liquid meal

Supplement: MOESM4 [file 25653108]
